# Supplementary material for: Improving nitrogen source utilization from defatted soybean meal for nisin production by enhancing proteolytic function of Lactococcus lactis F44
Source: PubMed Central journal article supplement (PMC5522456; doi:10.1038/s41598-017-06537-w), 2017-07-21
Supplement: 41598_2017_6537_MOESM1_ESM.pdf [file 41598_2017_6537_MOESM1_ESM.pdf]

**Supplementary Data for:**  
Improving nitrogen source utilization from defatted  
soybean meal for nisin production by enhancing  
proteolytic function of *Lactococcus lactis* F44

Jiaheng Liu<sup>1</sup>, Jianjian Zhou<sup>1</sup>, Lihong Wang, Zelin Ma, Guangrong Zhao, Zhiqiang Ge,  
Hongji Zhu, Jianjun Qiao<sup>2</sup>

<sup>1</sup>These authors contributed equally to this work.

<sup>2</sup>Correspondence and requests for materials should be addressed to J.Q. (email:

jianjunq@tju.edu.cn)

**Contents:**

**Supplementary Tables S1-S2**

**Supplementary Figure S1-S2**

**Supplementary Table S1. Strains and plasmids used in this study.**

| <b>Designation</b>            | <b>Relevant characteristics</b>                                                   | <b>Sources or references</b> |
|-------------------------------|-----------------------------------------------------------------------------------|------------------------------|
| <b>Strains</b>                |                                                                                   |                              |
| <i>Lactococcus lactis</i> F44 | nisin Z producer, constructed through genome 1 shuffling of <i>L. lactis</i> YF11 |                              |
| <i>Escherichia coli</i> TG1   | used for plasmid preparation                                                      | Laboratory stock             |
| <i>Micrococcus flavus</i>     | used as an indicator strain for bioassay of nisin                                 | ATCC 10240                   |
| <i>Bacillus subtilis</i> 168  | Used for cloning heterologous protease                                            | Laboratory stock             |
| <i>L. lactis</i> F44/poppA    | F44 harboring pLOPPA                                                              | This study                   |
| <i>L. lactis</i> F44/poppB    | F44 harboring pLOPPB                                                              | This study                   |
| <i>L. lactis</i> F44/poppC    | F44 harboring pLOPPC                                                              | This study                   |
| <i>L. lactis</i> F44/poppD    | F44 harboring pLOPPD                                                              | This study                   |
| <i>L. lactis</i> F44/poppF    | F44 harboring pLOPPF                                                              | This study                   |
| <i>L. lactis</i> F44/pnprE    | F44 harboring pLNPRE                                                              | This study                   |
| <i>L. lactis</i> F44/pnprB    | F44 harboring pLNPRB                                                              | This study                   |
| <i>L. lactis</i> F44/pvpr     | F44 harboring pLVPR                                                               | This study                   |
| <i>L. lactis</i> F44/ppepA    | F44 harboring pLPEPA                                                              | This study                   |
| <i>L. lactis</i> F44/ppepF    | F44 harboring pLPEPF                                                              | This study                   |
| <i>L. lactis</i> F44/ppepM    | F44 harboring pLPEPM                                                              | This study                   |
| <i>L. lactis</i> F44/ppepN    | F44 harboring pLPEPN                                                              | This study                   |
| <i>L. lactis</i> BAFM         | F44 harboring pLBAFM                                                              | This study                   |
| <b>Plasmids</b>               |                                                                                   |                              |

---

|         |                                                                                                                                           |            |
|---------|-------------------------------------------------------------------------------------------------------------------------------------------|------------|
| pLEB124 | Gram <sup>+</sup> cloning vector with an P45 promoter followed<br>by multiple restriction sites, Em <sup>r</sup>                          | 2          |
| pLOPPA  | pLEB124 carrying the <i>oppA</i> gene from F44, Em <sup>r</sup>                                                                           | This study |
| pLOPPB  | pLEB124 carrying the <i>oppB</i> gene from F44, Em <sup>r</sup>                                                                           | This study |
| pLOPPC  | pLEB124 carrying the <i>oppC</i> gene from F44, Em <sup>r</sup>                                                                           | This study |
| pLOPPD  | pLEB124 carrying the <i>oppD</i> gene from F44, Em <sup>r</sup>                                                                           | This study |
| pLOPPF  | pLEB124 carrying the <i>oppE</i> gene from F44, Em <sup>r</sup>                                                                           | This study |
| pLNPRE  | pLEB124 carrying the <i>nprE</i> gene from <i>B. subtilis</i> 168,<br>Em <sup>r</sup>                                                     | This study |
| pLNPRB  | pLEB124 carrying the <i>nprB</i> gene from <i>B. subtilis</i> 168,<br>Em <sup>r</sup>                                                     | This study |
| pLVPR   | pLEB124 carrying the <i>vpr</i> gene from <i>B. subtilis</i> 168,<br>Em <sup>r</sup>                                                      | This study |
| pLPEPA  | pLEB124 carrying the <i>pepA</i> gene from F44, Em <sup>r</sup>                                                                           | This study |
| pLPEPF  | pLEB124 carrying the <i>pepF</i> gene from F44, Em <sup>r</sup>                                                                           | This study |
| pLPEPM  | pLEB124 carrying the <i>pepM</i> gene from F44, Em <sup>r</sup>                                                                           | This study |
| pLPEPN  | pLEB124 carrying the <i>pepN</i> gene from F44, Em <sup>r</sup>                                                                           | This study |
| pLBAFM  | pLEB124 carrying the <i>nprB</i> from <i>B. subtilis</i> 168,<br><i>oppA</i> , <i>pepF</i> and <i>pepM</i> gene from F44, Em <sup>r</sup> | This study |

---

**Supplementary Table S2. Primers used in this study.**

| <b>Primer name</b> | <b>Primer sequence (5 to 3')<sup>a,b</sup></b>    |
|--------------------|---------------------------------------------------|
| nprB-F             | TCC <u><b>CCCGGG</b></u> AAATGGTAGATTCCAAAATAGG   |
| nprB-R             | CATG <u><b>CCATGG</b></u> CAGTCAGACTCTGTGTCCTGA   |
| nprE-F             | CGC <u><b>GGATCC</b></u> AAAAAAGGGGGATTTATTGTG    |
| nprE-R             | TCC <u><b>CCCGGG</b></u> TTACAATCCAACAGCATTCC     |
| vpr-F              | CGC <u><b>GGATCC</b></u> TTTTCTAAATACAAAGGGGGA    |
| vpr-R              | TCC <u><b>CCCGGG</b></u> ATCGCTTATTGCAGGAGG       |
| oppA-F             | CGC <u><b>GGATCC</b></u> AGTGACTCACCGATGAAAGC     |
| oppA-R             | TCC <u><b>CCCGGG</b></u> TGCACCATAGTCAAGCGTC      |
| oppB-F             | CGC <u><b>GGATCC</b></u> TAAGTCAGAGCCATTGGGC      |
| oppB-R             | TCC <u><b>CCCGGG</b></u> TCACTCCTTATTGAATCCGAA    |
| oppC-F             | CGC <u><b>GGATCC</b></u> CGGATTCAATAAGGAGTGAAAA   |
| oppC-R             | TCC <u><b>CCCGGG</b></u> GTTCGCAACGAAGTCGTTAC     |
| oppD-F             | CGC <u><b>GGATCC</b></u> TCAGGTTCTGGGAAGTCAAC     |
| oppD-R             | TCC <u><b>CCCGGG</b></u> AATCTACTCCATCAACGGCTA    |
| oppF-F             | CGC <u><b>GGATCC</b></u> TCATTTTGTTCGAGGTCAGG     |
| oppF-R             | TCC <u><b>CCCGGG</b></u> CCAATCAAACCTGAAAATGG     |
| pepA-F             | CGC <u><b>GGATCC</b></u> CGGAGGAGAAAAATGGAA       |
| pepA-R             | TCC <u><b>CCCGGG</b></u> TCCTAGTGATTTTTTCTTTTGT   |
| pepF-F             | CGC <u><b>GGATCC</b></u> TGCTAATAAGTTTTTAATGTGAAT |
| pepF-R             | TCC <u><b>CCCGGG</b></u> TGGGGTTACTTGTACGTTTA     |
| pepM-F             | CGC <u><b>GGATCC</b></u> CTGAGTTTTTCTCAGAACTTTAGA |
| pepM-R             | TCC <u><b>CCCGGG</b></u> CCTCTCATCTGTTTTTCCTTT    |
| pepN-F             | CGC <u><b>GGATCC</b></u> TTTAGGAGAAAACATGGC       |
| pepN-R             | TCC <u><b>CCCGGG</b></u> AAGTCAGACTAAGAATGAATAA   |
| BAFM-pepF-F        | <u>TATATAGGGCCCGGGT</u> GCTAATAAGTTTTTAATGTGAAT   |
| BAFM-pepF-R        | <u>CTGAGAAAAACTCAGT</u> GGGGTTACTTGTACGTTTA       |
| BAFM-pepM-F        | <u>GTACAAGTAACCCCACT</u> GAGTTTTTCTCAGAACTTTAGA   |
| BAFM-pepM-R        | <u>TGGAATCTACCATTT</u> CCTCTCATCTGTTTTTCCTTT      |
| BAFM-nprB-F        | <u>AAAACAGATGAGAGG</u> AAATGGTAGATTCCAAAATAGG     |
| BAFM-nprB-R        | <u>CATCGGTGAGTCACT</u> CAGTCAGACTCTGTGTCCTGA      |
| BAFM-oppA-F        | <u>CACAGAGTCTGACT</u> GAGTGACTCACCGATGAAAGC       |
| BAFM-oppA-R        | <u>TAATTATAACCCGGG</u> TGCACCATAGTCAAGCGTC        |

<sup>a</sup> Underlined and bold letters indicate restriction sites.

<sup>b</sup> Underlined sequences indicate homologous sequences.

## Supplementary Figure and Legend

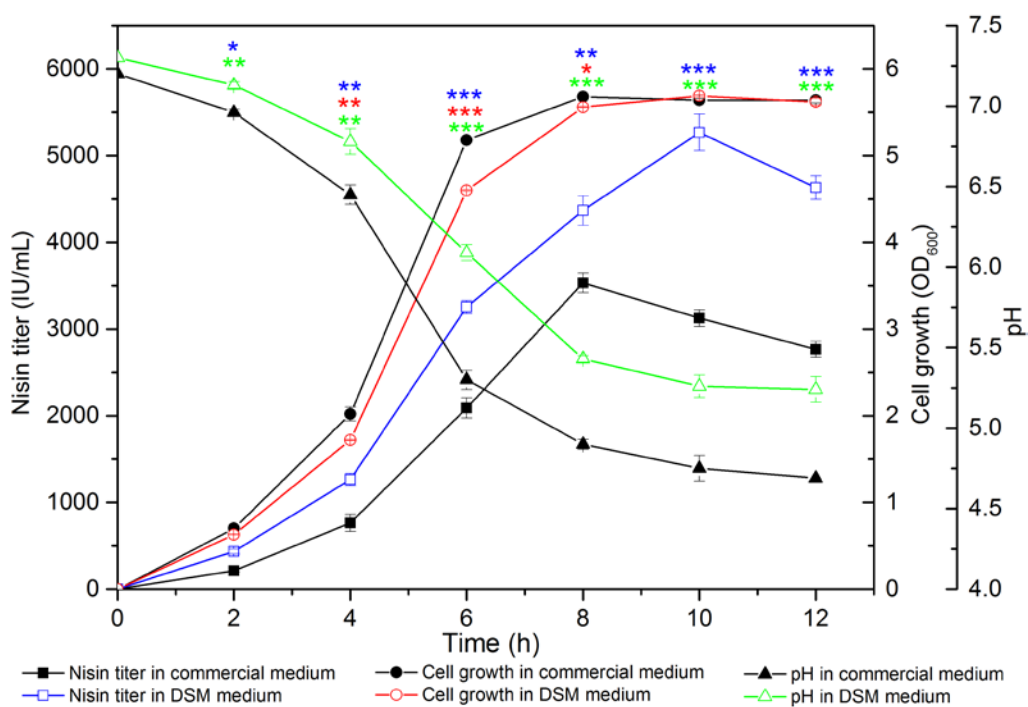

**Supplementary Figure S1.** Time profile of nisin titer (square), cell density (circle) and pH (triangle) of *L. lactis* BAFM cultured in DSM medium with 21 g/L DSM hydrolysates (hollow symbols) and commercial medium (solid symbols). Average data of triplicate experiments were presented. Error bars represent standard deviations from three parallel replicates. The data were analyzed by One-way ANOVA. Statistically significant differences between DSM medium groups and commercial medium groups were indicated by \* for  $p < 0.05$  \*\* for  $p < 0.01$  and \*\*\* for  $p < 0.001$ .

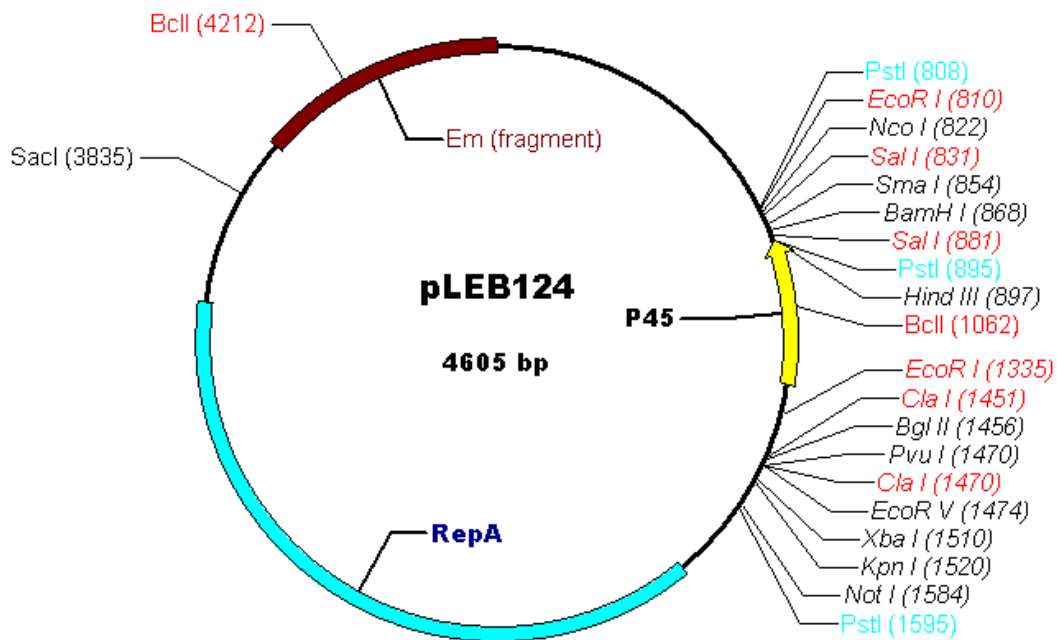

**Supplementary Figure S2. Physical map of pLEB124.**

## References

1. Zhang, Y. F. *et al.* Genome shuffling of *Lactococcus lactis subspecies lactis* YF11 for improving nisin Z production and comparative analysis. *J Dairy Sci.* **97**, 2528-2541 (2014).
2. Qiao M, Immonen T, Koponen O. & Saris P. E. J. The cellular location and effect on nisin immunity of the NisI protein from *Lactococcus lactis* N8 expressed in *Escherichia coli* and *L. lactis*. *FEMS Microbiol. Lett.* 131:75–80 (1995).
